# Supplementary material for: Screening of potential key ferroptosis-related genes in sepsis
Source: PeerJ journal article supplement (doi:10.7717/peerj.13983), 2022-09-13
Supplement: Supplementary_Table_1.pdf [file Supplementary_Table_1.pdf]

| Gene symbol | Gene name                                      | Role in ferroptosis |
|-------------|------------------------------------------------|---------------------|
| ACO1        | Aconitase 1                                    | driver              |
| ACSF2       | Acyl-CoA synthetase family member 2            | driver              |
| ACSL4       | Acyl-CoA synthetase long chain family member 4 | driver              |
| ACVR1B      | Activin A receptor type 1B                     | driver              |
| ALOX12      | Arachidonate 12-lipoxygenase, 12S type         | driver              |
| ALOX12B     | Arachidonate 12-lipoxygenase, 12R type         | driver              |
| ALOX15      | Arachidonate 15-lipoxygenase                   | driver              |
| ALOX15B     | Arachidonate 15-lipoxygenase type B            | driver              |
| ALOX5       | Arachidonate 5-lipoxygenase                    | driver              |
| ALOXE3      | Arachidonate lipoxygenase 3                    | driver              |
| ANO6        | Anoctamin 6                                    | driver              |
| ATF3        | Activating transcription factor 3              | driver              |
| ATG13       | Autophagy related 13                           | driver              |
| ATG16L1     | Autophagy related 16 like 1                    | driver              |
| ATG3        | Autophagy related 3                            | driver              |
| ATG4D       | Autophagy related 4D cysteine peptidase        | driver              |
| ATG5        | Autophagy related 5                            | driver              |
| ATG7        | Autophagy related 7                            | driver              |

|         |                                                               |        |
|---------|---------------------------------------------------------------|--------|
| ATM     | ATM serine/threonine kinase                                   | driver |
| ATP5MC3 | ATP synthase membrane subunit c locus 3                       | driver |
| BACH1   | BTB domain and CNC homolog 1                                  | driver |
| BAP1    | BRCA1 associated protein 1                                    | driver |
| BECN1   | Beclin 1                                                      | driver |
| BID     | BH3 interacting domain death agonist                          | driver |
| CARS1   | Cysteinyl-tRNA synthetase 1                                   | driver |
| CDKN2A  | Cyclin dependent kinase inhibitor 2A                          | driver |
| CDO1    | Cysteine dioxygenase type 1                                   | driver |
| CHAC1   | ChaC glutathione specific<br>gamma-glutamylcyclotransferase 1 | driver |
| CS      | Citrate synthase                                              | driver |
| CYBB    | Cytochrome b-245 beta chain                                   | driver |
| DNAJB6  | DnaJ heat shock protein family (Hsp40) member<br>B6           | driver |
| DPP4    | Dipeptidyl peptidase 4                                        | driver |
| DUOX1   | Dual oxidase 1                                                | driver |
| DUOX2   | Dual oxidase 2                                                | driver |
| EGFR    | Epidermal growth factor receptor                              | driver |
| EGLN2   | Egl-9 family hypoxia inducible factor 2                       | driver |

|           |                                                |        |
|-----------|------------------------------------------------|--------|
| ELAVL1    | ELAV like RNA binding protein 1                | driver |
| EMC2      | ER membrane protein complex subunit 2          | driver |
| EPAS1     | Endothelial PAS domain protein 1               | driver |
| FBXW7     | F-box and WD repeat domain containing 7        | driver |
| FLT3      | Fms related tyrosine kinase 3                  | driver |
| G6PD      | Glucose-6-phosphate dehydrogenase              | driver |
| G6PDX     | _NA_                                           | driver |
| GABARAPL1 | GABA type A receptor associated protein like 1 | driver |
| GABARAPL2 | GABA type A receptor associated protein like 2 | driver |
| GLS2      | Glutaminase 2                                  | driver |
| GOT1      | Glutamic-oxaloacetic transaminase 1            | driver |
| HIF1A     | Hypoxia inducible factor 1 subunit alpha       | driver |
| HILPDA    | Hypoxia inducible lipid droplet associated     | driver |
| HMGB1     | High mobility group box 1                      | driver |
| HMOX1     | Heme oxygenase 1                               | driver |
| HRAS      | HRas proto-oncogene, GTPase                    | driver |
| IDH1      | Isocitrate dehydrogenase (NADP(+)) 1           | driver |
| IFNG      | Interferon gamma                               | driver |
| IREB2     | Iron response element binding protein 2        | driver |
| KEAP1     | Kelch like ECH associated protein 1            | driver |

|           |                                                                        |        |
|-----------|------------------------------------------------------------------------|--------|
| KRAS      | KRAS proto-oncogene, GTPase                                            | driver |
| LINC00472 | Long intergenic non-protein coding RNA 472                             | driver |
| LONP1     | Lon peptidase 1, mitochondrial                                         | driver |
| LPCAT3    | Lysophosphatidylcholine acyltransferase 3                              | driver |
| LPIN1     | Lipin 1                                                                | driver |
| MAP1LC3A  | Microtubule associated protein 1 light chain 3<br>alpha                | driver |
| MAPK1     | Mitogen-activated protein kinase 1                                     | driver |
| MAPK14    | Mitogen-activated protein kinase 14                                    | driver |
| MAPK3     | Mitogen-activated protein kinase 3                                     | driver |
| MAPK8     | Mitogen-activated protein kinase 8                                     | driver |
| MAPK9     | Mitogen-activated protein kinase 9                                     | driver |
| MIOX      | Myo-inositol oxygenase                                                 | driver |
| MIR6852   | microRNA 6852                                                          | driver |
| MTDH      | Metadherin                                                             | driver |
| MYB       | MYB proto-oncogene, transcription factor                               | driver |
| NCOA4     | Nuclear receptor coactivator 4                                         | driver |
| NOX1      | Nicotinamide adenine dinucleotide phosphate<br>(NADPH) oxidase (NOX) 1 | driver |
| NOX3      | Nicotinamide adenine dinucleotide phosphate                            | driver |

|        |                                                                           |        |
|--------|---------------------------------------------------------------------------|--------|
|        | (NADPH) oxidase (NOX) 3                                                   |        |
| NOX4   | Nicotinamide adenine dinucleotide phosphate                               | driver |
|        | (NADPH) oxidase (NOX) 4                                                   |        |
| NOX5   | Nicotinamide adenine dinucleotide phosphate                               | driver |
|        | (NADPH) oxidase (NOX) 5                                                   |        |
| NRAS   | NRAS proto-oncogene, GTPase                                               | driver |
| PANX1  | Pannexin 1                                                                | driver |
| PEBP1  | Phosphatidylethanolamine binding protein 1                                | driver |
| PGD    | Phosphoglycerate dehydrogenase                                            | driver |
| PHKG2  | Phosphorylase kinase catalytic subunit gamma 2                            | driver |
| PIK3CA | Phosphatidylinositol-4,5-bisphosphate 3-kinase<br>catalytic subunit alpha | driver |
| PRKAA1 | Protein kinase AMP-activated catalytic subunit<br>alpha 1                 | driver |
| PRKAA2 | Protein kinase AMP-activated catalytic subunit<br>alpha 2                 | driver |
| RPL8   | Ribosomal protein L8                                                      | driver |
| SAT1   | Spermidine/spermine N1-acetyltransferase 1                                | driver |
| SCP2   | Sterol carrier protein 2                                                  | driver |
| SIRT1  | Sirtuin 1                                                                 | driver |

|         |                                                  |        |
|---------|--------------------------------------------------|--------|
| SLC1A5  | Solute carrier family 1 member 5                 | driver |
| SLC38A1 | Solute carrier family 38 member 1                | driver |
| SNX4    | Sorting nexin 4                                  | driver |
| SOCS1   | Suppressor of cytokine signaling 1               | driver |
| TAZ     | Tafazzin                                         | driver |
| TF      | Transferrin                                      | driver |
| TFR2    | Transferrin receptor 2                           | driver |
| TFRC    | Transferrin receptor                             | driver |
| TGFBR1  | Transforming growth factor beta receptor 1       | driver |
| TLR4    | Toll like receptor 4                             | driver |
| TNFAIP3 | TNF alpha induced protein 3                      | driver |
| TP53    | Tumor protein p53                                | driver |
| ULK1    | Unc-51 like autophagy activating kinase 1        | driver |
| ULK2    | Unc-51 like autophagy activating kinase 2        | driver |
| VDAC2   | Valtage-dependent anion channels 2               | driver |
| WIPI1   | WD repeat domain, phosphoinositide interacting 1 | driver |
| WIPI2   | WD repeat domain, phosphoinositide interacting 2 | driver |
| YY1AP1  | YY1 associated protein 1                         | driver |
| ZEB1    | Zinc finger E-box binding homeobox 1             | driver |
| AGPAT3  | 1-acylglycerol-3-phosphate O-acyltransferase 3   | marker |

|                |                                                  |        |
|----------------|--------------------------------------------------|--------|
| ALB            | Albumin                                          | marker |
| ANGPTL7        | Angiopoietin like 7                              | marker |
| ARRDC3         | Arrestin domain containing 3                     | marker |
| ASNS           | Asparagine synthetase (glutamine-hydrolyzing)    | marker |
| ATF4           | Activating transcription factor 4                | marker |
| ATP6V1G2       | ATPase H <sup>+</sup> transporting V1 subunit G2 | marker |
| AURKA          | Aurora kinase A                                  | marker |
| BLOC1S5-TXNDC5 | BLOC1S5-TXNDC5 readthrough (NMD candidate)       | marker |
| BNIP3          | BCL2 interacting protein 3                       | marker |
| CAPG           | Capping actin protein, gelsolin like             | marker |
| CBS            | Cystathionine beta-synthase                      | marker |
| CEBPG          | CCAAT enhancer binding protein gamma             | marker |
| CXCL2          | C-X-C motif chemokine ligand 2                   | marker |
| DDIT3          | DNA damage inducible transcript 3                | marker |
| DDIT4          | DNA damage inducible transcript 4                | marker |
| DRD4           | Dopamine receptor D4                             | marker |
| DRD5           | Dopamine receptor D5                             | marker |
| DUSP1          | Dual specificity phosphatase 1                   | marker |
| EIF2AK4        | Eukaryotic translation initiation factor 2 alpha | marker |

|          |                                                                   |        |
|----------|-------------------------------------------------------------------|--------|
|          | kinase 4                                                          |        |
| EIF2S1   | Eukaryotic translation initiation factor 2 subunit 1              | marker |
| FTH1     | Ferritin heavy chain 1                                            | marker |
| FTL      | Ferritin light chain                                              | marker |
| GABPB1   | GA binding protein transcription factor subunit<br>beta 1         | marker |
| GDF15    | Growth differentiation factor 15                                  | marker |
| GPT2     | Glutamic--pyruvic transaminase 2                                  | marker |
| GPX2     | Glutathione peroxidase 2                                          | marker |
| GPX4     | Glutathione peroxidase 4                                          | marker |
| HAMP     | Hepcidin antimicrobial peptide                                    | marker |
| HBA1     | Hemoglobin subunit alpha 1                                        | marker |
| HERPUD1  | Homocysteine inducible ER protein with ubiquitin<br>like domain 1 | marker |
| HIC1     | HIC ZBTB transcriptional repressor 1                              | marker |
| HNF4A    | Hepatocyte nuclear factor 4 alpha                                 | marker |
| HSD17B11 | Hydroxysteroid 17-beta dehydrogenase 11                           | marker |
| HSPB1    | Heat shock protein family B (small) member 1                      | marker |
| IL33     | Interleukin 33                                                    | marker |
| IL6      | Interleukin 6                                                     | marker |



|         |                                                       |        |
|---------|-------------------------------------------------------|--------|
| JDP2    | Jun dimerization protein 2                            | marker |
| KLHL24  | Kelch like family member 24                           | marker |
| LURAP1L | Leucine rich adaptor protein 1 like                   | marker |
| MAFG    | MAF bZIP transcription factor G                       | marker |
| MAP3K5  | Mitogen-activated protein kinase kinase kinase 5      | marker |
| MIR30B  | microRNA 30b                                          | marker |
| MIR4715 | microRNA 4715                                         | marker |
| MT3     | Metallothionein 3                                     | marker |
| NCF2    | Neutrophil cytosolic factor 2                         | marker |
| NFE2L2  | Nuclear factor, erythroid 2 like 2                    | marker |
| NGB     | Neuroglobin                                           | marker |
| NNMT    | Nicotinamide N-methyltransferase                      | marker |
| NOS2    | Nitric oxide synthase 2                               | marker |
| OXSRL1  | Oxidative stress responsive kinase 1                  | marker |
| PCK2    | Phosphoenolpyruvate carboxykinase 2,<br>mitochondrial | marker |
| PLIN4   | Perilipin 4                                           | marker |
| PRDX1   | Peroxiredoxin 1                                       | marker |
| PSAT1   | Phosphoserine aminotransferase 1                      | marker |
| PTGS2   | Prostaglandin-endoperoxide synthase 2                 | marker |

|          |                                                               |        |
|----------|---------------------------------------------------------------|--------|
| RELA     | RELA proto-oncogene, NF-kB subunit                            | marker |
| RGS4     | Regulator of G protein signaling 4                            | marker |
| RIPK1    | Receptor interacting serine/threonine kinase 1                | marker |
| RRM2     | Ribonucleotide reductase regulatory subunit M2                | marker |
| SELENOS  | Selenoprotein S                                               | marker |
| SESN2    | Sestrin 2                                                     | marker |
| SETD1B   | SET domain containing 1B, histone lysine<br>methyltransferase | marker |
| SLC1A4   | Solute carrier family 1 member 4                              | marker |
| SLC2A1   | Solute carrier family 2 member 1                              | marker |
| SLC2A12  | Solute carrier family 2 member 12                             | marker |
| SLC2A14  | Solute carrier family 2 member 14                             | marker |
| SLC2A3   | Solute carrier family 2 member 3                              | marker |
| SLC2A6   | Solute carrier family 2 member 6                              | marker |
| SLC2A8   | Solute carrier family 2 member 8                              | marker |
| SLC3A2   | Solute carrier family 3 member 2                              | marker |
| SLC40A1  | Solute carrier family 40 member 1                             | marker |
| SLC7A11  | Solute carrier family 7 member 11                             | marker |
| SLC7A5   | Solute carrier family 7 member 5                              | marker |
| SNORA16A | Small nucleolar RNA, H/ACA box 16A                            | marker |

|         |                                                                                   |            |
|---------|-----------------------------------------------------------------------------------|------------|
| SP1     | Sp1 transcription factor                                                          | marker     |
| SRXN1   | Sulfiredoxin 1                                                                    | marker     |
| STEAP3  | STEAP3 metalloreductase                                                           | marker     |
| STMN1   | Stathmin 1                                                                        | marker     |
| TFAP2C  | Transcription factor AP-2 gamma                                                   | marker     |
| TRIB3   | Tribbles pseudokinase 3                                                           | marker     |
| TSC22D3 | TSC22 domain family member 3                                                      | marker     |
| TUBE1   | Tubulin epsilon 1                                                                 | marker     |
| TXNIP   | Thioredoxin interacting protein                                                   | marker     |
| TXNRD1  | Thioredoxin reductase 1                                                           | marker     |
| UBC     | Ubiquitin C                                                                       | marker     |
| VEGFA   | Vascular endothelial growth factor A                                              | marker     |
| VLDLR   | Very low density lipoprotein receptor                                             | marker     |
| XBP1    | X-box binding protein 1                                                           | marker     |
| YWHAE   | Tyrosine 3-monooxygenase/tryptophan<br>5-monooxygenase activation protein epsilon | marker     |
| ZFP69B  | ZFP69 zinc finger protein B                                                       | marker     |
| ZNF419  | Zinc finger protein 419                                                           | marker     |
| ACSL3   | Acyl-CoA synthetase long chain family member 3                                    | suppressor |
| AIFM2   | Apoptosis inducing factor mitochondria associated                                 | suppressor |

|        |                                                        |            |
|--------|--------------------------------------------------------|------------|
| AKR1C1 | Aldo-keto reductase family 1 member C1                 | suppressor |
| AKR1C2 | Aldo-keto reductase family 1 member C2                 | suppressor |
| AKR1C3 | Aldo-keto reductase family 1 member C3                 | suppressor |
| ARNTL  | Aryl hydrocarbon receptor nuclear translocator<br>like | suppressor |
| BRD4   | Bromodomain containing 4                               | suppressor |
| CA9    | Carbonic anhydrase 9                                   | suppressor |
| CAV1   | Caveolin 1                                             | suppressor |
| CD44   | CD44 molecule (Indian blood group)                     | suppressor |
| CDKN1A | Cyclin dependent kinase inhibitor 1A                   | suppressor |
| CHMP5  | Charged multivesicular body protein 5                  | suppressor |
| CHMP6  | Charged multivesicular body protein 6                  | suppressor |
| CISD1  | CDGSH iron sulfur domain 1                             | suppressor |
| CISD2  | CDGSH iron sulfur domain 2                             | suppressor |
| FADS2  | Fatty acid desaturase 2                                | suppressor |
| FH     | Fumarate hydratase                                     | suppressor |
| GCH1   | GTP cyclohydrolase 1                                   | suppressor |
| HELLS  | Helicase, lymphoid specific                            | suppressor |
| HSF1   | Heat shock transcription factor 1                      | suppressor |

|           |                                                       |            |
|-----------|-------------------------------------------------------|------------|
| HSPA5     | Heat shock protein family A (Hsp70) member 5          | suppressor |
| ISCU      | Iron-sulfur cluster assembly enzyme                   | suppressor |
| JUN       | Jun proto-oncogene, AP-1 transcription factor subunit | suppressor |
| LAMP2     | Lysosomal associated membrane protein 2               | suppressor |
| LINC00336 | Long intergenic non-protein coding RNA 336            | suppressor |
| MIR137    | microRNA 137                                          | suppressor |
| MIR17     | microRNA 17                                           | suppressor |
| MIR9-1    | microRNA 9-1                                          | suppressor |
| MIR9-2    | microRNA 9-2                                          | suppressor |
| MIR9-3    | microRNA 9-3                                          | suppressor |
| MT1G      | Metallothionein 1G                                    | suppressor |
| MUC1      | Mucin 1, cell surface associated                      | suppressor |
| NF2       | Neurofibromin 2                                       | suppressor |
| NFS1      | NFS1 cysteine desulfurase                             | suppressor |
| NQO1      | NAD(P)H quinone dehydrogenase 1                       | suppressor |
| OTUB1     | OTU deubiquitinase, ubiquitin aldehyde binding 1      | suppressor |
| PLIN2     | Perilipin 2                                           | suppressor |
| PML       | Promyelocytic leukemia                                | suppressor |
| PRDX6     | Peroxiredoxin 6                                       | suppressor |

|        |                                                    |            |
|--------|----------------------------------------------------|------------|
| PROM2  | Prominin 2                                         | suppressor |
| RB1    | RB transcriptional corepressor 1                   | suppressor |
| SCD    | Stearoyl-CoA desaturase                            | suppressor |
| SQSTM1 | Sequestosome 1                                     | suppressor |
| SRC    | SRC proto-oncogene, non-receptor tyrosine kinase   | suppressor |
| STAT3  | Signal transducer and activator of transcription 3 | suppressor |
| TMBIM4 | Transmembrane BAX inhibitor motif containing 4     | suppressor |
| TP63   | Tumor protein p63                                  | suppressor |
| ZFP36  | ZFP36 ring finger protein                          | suppressor |

---
