# Supplementary material for: Screening of potential key ferroptosis-related genes in sepsis
Source: PeerJ journal article supplement (doi:10.7717/peerj.13983), 2022-09-13
Supplement: Supplementary_Table_2.pdf [file Supplementary_Table_2.pdf]

---

| name                                                     | forward (5'-3')                 | reverse (5'-3')                                         |
|----------------------------------------------------------|---------------------------------|---------------------------------------------------------|
| MAPK14                                                   | CGCTTTGTTGACTTCC<br>AACC        | TTTGACGATGTTGTCGTGGT                                    |
| DUSP1                                                    | GTTGTTGGATTGTCGC<br>TCCTT       | TTGGGCACGATATGCTCCAG                                    |
| MAP3K5                                                   | TTTGTTTCGTGAGACT<br>GCGTACC     | AGACACTTGGGCACACTACACA                                  |
| MAPK1                                                    | TGCTTTCTCTCCCGCA<br>CAAA        | TGAATGGCGCTTCAGCAATG                                    |
| MAPK8                                                    | TTCCCAGCTGACTCAG<br>AGCATAAC    | TAGTCATCTACAGCAGCCCAGAGG                                |
| NEAT1                                                    | CTTCCTCCCTTTAACTT<br>ATCCATTCAC | CTCTTCCTCCACCATTACCAACAATAC                             |
| let-7b-5p                                                | GGGTGAGGTAGTAGGT<br>TGT         | GTTGGCTCTGGTGCAGGGTCCGAGGTATTTCGC<br>ACCAGAGCCAACAACCAC |
| the universal reverse PCR primer, 5'-GTGCAGGGTCCGAGGT-3' |                                 |                                                         |

---
