# Supplementary material for: Screening of potential key ferroptosis-related genes in sepsis
Source: PeerJ journal article supplement (doi:10.7717/peerj.13983), 2022-09-13
Supplement: Supplementary_Table_3.pdf [file Supplementary_Table_3.pdf]

|                          | Gene symbol | adj.p.value | logFC | Gene title                                          | ID          |
|--------------------------|-------------|-------------|-------|-----------------------------------------------------|-------------|
| UP<br>regulated<br>genes | SLC2A3      | 3.71E-09    | 2.090 | solute carrier family 2 member 3                    | 202498_s_at |
|                          | PGD         | 1.48E-09    | 2.060 | phosphogluconate<br>dehydrogenase                   | 201118_at   |
|                          | MAPK14      | 9.67E-09    | 2.010 | mitogen-activated protein kinase<br>14              | 210449_x_at |
|                          | ALOX5       | 0.00000207  | 1.470 | arachidonate 5-lipoxygenase                         | 214366_s_at |
|                          | WIP1        | 0.00000643  | 1.270 | WD repeat domain,<br>phosphoinositide interacting 1 | 213836_s_at |
|                          | G6PD        | 0.0000539   | 1.130 | glucose-6-phosphate<br>dehydrogenase                | 202275_at   |
|                          | JDP2        | 0.0000205   | 1.130 | Jun dimerization protein 2                          | 226267_at   |
|                          | SLC40A1     | 0.00000178  | 1.110 | solute carrier family 40 member<br>1                | 223044_at   |
|                          | TLR4        | 0.00732     | 1.110 | toll like receptor 4                                | 232068_s_at |
|                          | ACSL4       | 0.00126     | 1.100 | acyl-CoA synthetase long-chain<br>family member 4   | 202422_s_at |
|                          | LAMP2       | 0.000177    | 1.070 | lysosomal associated membrane                       | 203041_s_at |

|        |             |       |                                                                                         |              |
|--------|-------------|-------|-----------------------------------------------------------------------------------------|--------------|
|        |             |       | protein 2                                                                               |              |
| ATG7   | 0.000000484 | 1.040 | autophagy related 7                                                                     | 218673_s_at  |
| MAPK1  | 0.000000531 | 1.030 | mitogen-activated protein kinase<br>1                                                   | 212271_at    |
| SP1    | 0.0039      | 1.010 | Sp1 transcription factor                                                                | 1553685_s_at |
| MAFG   | 3.95E-09    | 0.991 | MAF bZIP transcription factor G                                                         | 204970_s_at  |
| CD44   | 0.00346     | 0.98  | CD44 molecule (Indian blood<br>group)                                                   | 1565868_at   |
| STAT3  | 0.00000384  | 0.953 | signal transducer and activator<br>of transcription 3                                   | 208992_s_at  |
| ACVR1B | 0.00000112  | 0.947 | activin A receptor type 1B                                                              | 213198_at    |
| YWHAE  | 0.00114     | 0.932 | tyrosine<br>3-monooxygenase/tryptophan<br>5-monooxygenase activation<br>protein epsilon | 210317_s_at  |
| IDH1   | 0.000306    | 0.905 | isocitrate dehydrogenase<br>(NADP(+)) 1, cytosolic                                      | 1555037_a_at |
| CAPG   | 0.000146    | 0.890 | capping actin protein, gelsolin<br>like                                                 | 201850_at    |
| MAP3K5 | 0.0000586   | 0.878 | mitogen-activated protein kinase                                                        | 203836_s_at  |

|           |            |       |                                  |             |
|-----------|------------|-------|----------------------------------|-------------|
|           |            |       | kinase kinase 5                  |             |
| SAT1      | 0.00000336 | 0.864 | spermidine/spermine              | 213988_s_at |
|           |            |       | N1-acetyltransferase 1           |             |
| FLT3      | 0.000299   | 0.834 | fms related tyrosine kinase 3    | 206674_at   |
| NCF2      | 0.0000686  | 0.833 | neutrophil cytosolic factor 2    | 209949_at   |
| CYBB      | 0.00167    | 0.826 | cytochrome b-245 beta chain      | 203922_s_at |
| BID       | 0.00275    | 0.811 | BH3 interacting domain death     | 204493_at   |
|           |            |       | agonist                          |             |
| EPAS1     | 0.00174    | 0.758 | endothelial PAS domain protein   | 200878_at   |
|           |            |       | 1                                |             |
| ZFP36     | 0.000701   | 0.653 | ZFP36 ring finger protein        | 201531_at   |
| GABARAPL2 | 0.000531   | 0.620 | GABA type A receptor             | 209046_s_at |
|           |            |       | associated protein like 2        |             |
| SLC7A5    | 0.0278     | 0.604 | solute carrier family 7 member 5 | 201195_s_at |
| DUSP1     | 0.0202     | 0.550 | dual specificity phosphatase 1   | 201044_x_at |
| HMOX1     | 0.0291     | 0.536 | heme oxygenase 1                 | 203665_at   |
| BACH1     | 0.0388     | 0.534 | BTB domain and CNC homolog       | 204194_at   |
|           |            |       | 1                                |             |
| FTH1      | 0.0000905  | 0.508 | ferritin heavy chain 1           | 200748_s_at |
| TXNRD1    | 0.00987    | 0.506 | thioredoxin reductase 1          | 201266_at   |

|                     |         |           |        |                                            |              |
|---------------------|---------|-----------|--------|--------------------------------------------|--------------|
|                     | CBS     | 0.00699   | 0.503  | cystathionine-beta-synthase                | 1553972_a_at |
|                     | SRXN1   | 0.0223    | 0.502  | sulfiredoxin 1                             | 225252_at    |
| Down regulated gene | SLC38A1 | 0.0000437 | -1.390 | solute carrier family 38 member 1          | 224579_at    |
|                     | ATM     | 0.00005   | -1.190 | ATM serine/threonine kinase                | 212672_at    |
|                     | AKR1C3  | 0.000277  | -1.030 | aldo-keto reductase family 1, member C3    | 209160_at    |
|                     | TUBE1   | 0.00821   | -0.924 | tubulin epsilon 1                          | 226181_at    |
|                     | LPIN1   | 0.000328  | -0.919 | lipin 1                                    | 212276_at    |
|                     | PEBP1   | 0.000409  | -0.901 | phosphatidylethanolamine binding protein 1 | 210825_s_at  |
|                     | MAPK8   | 0.0000263 | -0.770 | mitogen-activated protein kinase 8         | 229664_at    |
|                     | ZEB1    | 0.000535  | -0.736 | zinc finger E-box binding homeobox 1       | 212764_at    |
|                     | DPP4    | 0.021     | -0.676 | dipeptidyl peptidase 4                     | 211478_s_at  |
|                     | SNX4    | 0.00708   | -0.654 | sorting nexin 4                            | 212652_s_at  |
|                     | SIRT1   | 0.00287   | -0.647 | sirtuin 1                                  | 218878_s_at  |
|                     | ARRDC3  | 0.0078    | -0.642 | arrestin domain containing 3               | 224797_at    |

|        |        |        |                             |             |
|--------|--------|--------|-----------------------------|-------------|
| BNIP3  | 0.0418 | -0.631 | BCL2 interacting protein 3  | 201849_at   |
| SCP2   | 0.0204 | -0.595 | sterol carrier protein 2    | 211733_x_at |
| KLHL24 | 0.0424 | -0.573 | kelch like family member 24 | 226158_at   |

---
