# Supplementary material for: Screening of potential key ferroptosis-related genes in sepsis
Source: PeerJ journal article supplement (doi:10.7717/peerj.13983), 2022-09-13
Supplement: Supplementary_Table_4.pdf [file Supplementary_Table_4.pdf]

|                          | Gene symbol | adj.p.value | logFC | Gene title                                          | ID          |
|--------------------------|-------------|-------------|-------|-----------------------------------------------------|-------------|
| Up<br>regulated<br>genes | ACSL4       | 6.62E-06    | 2.289 | acyl-CoA synthetase long-chain<br>family member 4   | 202422_s_at |
|                          | RRM2        | 2.15E-05    | 2.135 | ribonucleotide reductase regulatory<br>subunit M2   | 201890_at   |
|                          | SLC2A3      | 1.97E-08    | 1.987 | solute carrier family 2 member 3                    | 202499_s_at |
|                          | MAPK14      | 2.5E-06     | 1.758 | mitogen-activated protein kinase 14                 | 211561_x_at |
|                          | CISD2       | 6.85E-07    | 1.717 | CDGSH iron sulfur domain 2                          | 226686_at   |
|                          | WIPI1       | 4.66E-06    | 1.706 | WD repeat domain,<br>phosphoinositide interacting 1 | 213836_s_at |
|                          | SLC40A1     | 5.18E-06    | 1.633 | solute carrier family 40 member 1                   | 223044_at   |
|                          | PGD         | 8.13E-06    | 1.597 | phosphogluconate dehydrogenase                      | 201118_at   |
|                          | EMC2        | 0.000497    | 1.544 | ER membrane protein complex<br>subunit 2            | 203584_at   |
|                          | ACSL3       | 1.37E-06    | 1.486 | acyl-CoA synthetase long-chain<br>family member 3   | 201660_at   |
|                          | CHMP5       | 0.000524    | 1.472 | charged multivesicular body protein<br>5            | 218085_at   |
|                          | EPAS1       | 0.000095    | 1.461 | endothelial PAS domain protein 1                    | 200878_at   |

|        |          |       |                                                           |             |
|--------|----------|-------|-----------------------------------------------------------|-------------|
| CAPG   | 3.38E-08 | 1.379 | capping actin protein, gelsolin like                      | 201850_at   |
| CYBB   | 0.000034 | 1.285 | cytochrome b-245 beta chain                               | 203923_s_at |
| IDH1   | 3.83E-07 | 1.282 | isocitrate dehydrogenase (NADP(+))<br>1, cytosolic        | 201193_at   |
| TGFBR1 | 0.00149  | 1.269 | transforming growth factor beta<br>receptor 1             | 224793_s_at |
| TFRC   | 0.00123  | 1.247 | transferrin receptor                                      | 208691_at   |
| RB1    | 0.000558 | 1.180 | RB transcriptional corepressor 1                          | 203132_at   |
| ACVR1B | 4.66E-06 | 1.160 | activin A receptor type 1B                                | 213198_at   |
| NRAS   | 0.000182 | 1.143 | neuroblastoma RAS viral oncogene<br>homolog               | 202647_s_at |
| MAFG   | 7.89E-09 | 1.129 | MAF bZIP transcription factor G                           | 204970_s_at |
| PRKAA1 | 0.00245  | 1.059 | protein kinase AMP-activated<br>catalytic subunit alpha 1 | 225984_at   |
| CD44   | 0.000645 | 1.000 | CD44 molecule (Indian blood group)                        | 217523_at   |
| ALOX5  | 2.75E-06 | 0.999 | arachidonate 5-lipoxygenase                               | 204446_s_at |
| AURKA  | 0.000985 | 0.972 | aurora kinase A                                           | 208079_s_at |
| MTDH   | 0.0125   | 0.971 | metadherin                                                | 212250_at   |
| TLR4   | 0.0297   | 0.957 | toll like receptor 4                                      | 232068_s_at |
| HIF1A  | 0.0072   | 0.913 | hypoxia inducible factor 1 alpha                          | 200989_at   |

|           |          |       |                                                   |              |
|-----------|----------|-------|---------------------------------------------------|--------------|
|           |          |       | subunit                                           |              |
| GABARAPL2 | 2.28E-05 | 0.900 | GABA type A receptor associated<br>protein like 2 | 209046_s_at  |
| PSAT1     | 0.0151   | 0.851 | phosphoserine aminotransferase 1                  | 223062_s_at  |
| GCH1      | 0.00578  | 0.851 | GTP cyclohydrolase 1                              | 204224_s_at  |
| MAPK1     | 3.13E-06 | 0.841 | mitogen-activated protein kinase 1                | 212271_at    |
| JDP2      | 6.58E-05 | 0.840 | Jun dimerization protein 2                        | 226267_at    |
| SAT1      | 0.00012  | 0.838 | spermidine/spermine<br>N1-acetyltransferase 1     | 203455_s_at  |
| SLC7A5    | 0.00392  | 0.777 | solute carrier family 7 member 5                  | 201195_s_at  |
| LAMP2     | 0.000994 | 0.708 | lysosomal associated membrane<br>protein 2        | 200821_at    |
| VEGFA     | 0.0315   | 0.685 | vascular endothelial growth factor A              | 210512_s_at  |
| CBS       | 0.00193  | 0.674 | cystathionine-beta-synthase                       | 1553972_a_at |
| DUSP1     | 0.0444   | 0.667 | dual specificity phosphatase 1                    | 201041_s_at  |
| KRAS      | 0.000804 | 0.667 | KRAS proto-oncogene, GTPase                       | 204009_s_at  |
| ATG3      | 0.000106 | 0.663 | autophagy related 3                               | 220237_at    |
| SESN2     | 0.0179   | 0.637 | sestrin 2                                         | 223196_s_at  |
| SNX4      | 0.0186   | 0.598 | sorting nexin 4                                   | 205329_s_at  |
| DNAJB6    | 0.00352  | 0.594 | DnaJ heat shock protein family                    | 209015_s_at  |

|                            |         |          |        |                                                     |             |
|----------------------------|---------|----------|--------|-----------------------------------------------------|-------------|
|                            |         |          |        | (Hsp40) member B6                                   |             |
|                            | SLC2A1  | 0.00178  | 0.577  | solute carrier family 2 member 1                    | 201250_s_at |
|                            | G6PD    | 0.0445   | 0.560  | glucose-6-phosphate dehydrogenase                   | 202275_at   |
|                            | FLT3    | 0.000312 | 0.559  | fms related tyrosine kinase 3                       | 206674_at   |
|                            | SLC7A11 | 3.34E-05 | 0.533  | solute carrier family 7 member 11                   | 209921_at   |
|                            | MAP3K5  | 0.00906  | 0.529  | mitogen-activated protein kinase<br>kinase kinase 5 | 203837_at   |
|                            | GDF15   | 0.00684  | 0.523  | growth differentiation factor 15                    | 221577_x_at |
| Down<br>regulated<br>genes | SLC38A1 | 1.15E-06 | -2.008 | solute carrier family 38 member 1                   | 218237_s_at |
|                            | PEBP1   | 2.41E-07 | -1.724 | phosphatidylethanolamine binding<br>protein 1       | 210825_s_at |
|                            | TP53    | 1.89E-07 | -1.350 | tumor protein p53                                   | 201746_at   |
|                            | LPIN1   | 1.35E-05 | -1.266 | lipin 1                                             | 212274_at   |
|                            | TXNIP   | 0.0082   | -1.118 | thioredoxin interacting protein                     | 201008_s_at |
|                            | DPP4    | 1.05E-05 | -1.114 | dipeptidyl peptidase 4                              | 211478_s_at |
|                            | ATM     | 0.00241  | -1.093 | ATM serine/threonine kinase                         | 210858_x_at |
|                            | RPL8    | 1.97E-05 | -0.953 | ribosomal protein L8                                | 200936_at   |
|                            | AKR1C3  | 0.0139   | -0.938 | aldo-keto reductase family 1,                       | 209160_at   |

|         |          |        |                                                                   |             |
|---------|----------|--------|-------------------------------------------------------------------|-------------|
|         |          |        | member C3                                                         |             |
| ELAVL1  | 0.000164 | -0.775 | ELAV like RNA binding protein 1                                   | 227746_at   |
| ATG16L1 | 0.000556 | -0.762 | autophagy related 16 like 1                                       | 220521_s_at |
| LONP1   | 2.27E-05 | -0.761 | lon peptidase 1, mitochondrial                                    | 209017_s_at |
| ZNF419  | 1.81E-05 | -0.733 | zinc finger protein 419                                           | 219826_at   |
| CS      | 2.83E-05 | -0.652 | citrate synthase                                                  | 208660_at   |
| MAPK8   | 0.000205 | -0.623 | mitogen-activated protein kinase 8                                | 229664_at   |
| BRD4    | 0.0249   | -0.563 | bromodomain containing 4                                          | 202102_s_at |
| AGPAT3  | 0.025    | -0.552 | 1-acylglycerol-3-phosphate<br>O-acyltransferase 3                 | 223182_s_at |
| ZEB1    | 0.0133   | -0.542 | zinc finger E-box binding homeobox<br>1                           | 212758_s_at |
| RELA    | 2.86E-05 | -0.538 | RELA proto-oncogene, NF-kB<br>subunit                             | 201783_s_at |
| HERPUD1 | 0.00105  | -0.536 | homocysteine inducible ER protein<br>with ubiquitin like domain 1 | 217168_s_at |
| SQSTM1  | 0.0007   | -0.531 | sequestosome 1                                                    | 201471_s_at |
| ACSF2   | 3.48E-05 | -0.518 | acyl-CoA synthetase family member<br>2                            | 218844_at   |
| EIF2AK4 | 0.0231   | -0.511 | eukaryotic translation initiation                                 | 225164_s_at |

|       |         |        |                                                     |             |
|-------|---------|--------|-----------------------------------------------------|-------------|
|       |         |        | factor 2 alpha kinase 4                             |             |
| WIPI2 | 0.00128 | -0.508 | WD repeat domain,<br>phosphoinositide interacting 2 | 204710_s_at |
| FH    | 0.00155 | -0.500 | fumarate hydratase                                  | 214170_x_at |

---
