# Supplementary material for: Screening of potential key ferroptosis-related genes in sepsis
Source: PeerJ journal article supplement (doi:10.7717/peerj.13983), 2022-09-13
Supplement: Supplementary_Table_5.pdf [file Supplementary_Table_5.pdf]

| Category  | Term                                                                            | Count | %           | P.value     |
|-----------|---------------------------------------------------------------------------------|-------|-------------|-------------|
| GOTERM_BP | positive regulation of<br>transcription from RNA<br>polymerase II promoter      | 8     | 23.52941176 | 0.002546543 |
| GOTERM_BP | oxidation-reduction process                                                     | 6     | 17.64705882 | 0.005610003 |
| GOTERM_BP | peptidyl-serine phosphorylation                                                 | 4     | 11.76470588 | 0.001866441 |
| GOTERM_BP | positive regulation of apoptotic<br>process                                     | 4     | 11.76470588 | 0.020742413 |
| GOTERM_BP | activation of MAPK activity                                                     | 4     | 11.76470588 | 0.018676979 |
| GOTERM_BP | peptidyl-serine phosphorylation                                                 | 4     | 11.76470588 | 0.001866441 |
| GOTERM_BP | regulation of transcription from<br>RNA polymerase II promoter                  | 4     | 11.76470588 | 0.010513576 |
| GOTERM_BP | protein phosphorylation                                                         | 4     | 11.76470588 | 0.011778766 |
| GOTERM_BP | positive regulation of gene<br>expression                                       | 4     | 11.76470588 | 0.01450783  |
| GOTERM_BP | activation of MAPK activity                                                     | 4     | 11.76470588 | 0.018676979 |
| GOTERM_BP | regulation of sequence-specific<br>DNA binding transcription factor<br>activity | 3     | 8.823529412 | 0.001092241 |
| GOTERM_BP | lipopolysaccharide-mediated                                                     | 3     | 8.823529412 | 0.00179038  |

|           |                                 |    |             |             |
|-----------|---------------------------------|----|-------------|-------------|
|           | signaling pathway               |    |             |             |
| GOTERM_BP | peptidyl-threonine              | 3  | 8.823529412 | 0.002518959 |
|           | phosphorylation                 |    |             |             |
| GOTERM_BP | response to nutrient            | 3  | 8.823529412 | 0.009260802 |
| GOTERM_BP | cellular response to            | 3  | 8.823529412 | 0.02068917  |
|           | lipopolysaccharide              |    |             |             |
| GOTERM_BP | protein autophosphorylation     | 3  | 8.823529412 | 0.044762732 |
| GOTERM_BP | response to hypoxia             | 3  | 8.823529412 | 0.044762732 |
| GOTERM_CC | cytosol                         | 18 | 52.94117647 | 1.49E-05    |
| GOTERM_CC | nucleus                         | 17 | 50          | 0.017697554 |
| GOTERM_CC | extracellular exosome           | 16 | 47.05882353 | 4.15E-05    |
| GOTERM_CC | integral component of plasma    | 9  | 26.47058824 | 0.003107806 |
|           | membrane                        |    |             |             |
| GOTERM_CC | intracellular                   | 7  | 20.58823529 | 0.001578994 |
| GOTERM_CC | cytoplasm                       | 7  | 20.58823529 | 0.030391157 |
| GOTERM_CC | nuclear envelope                | 3  | 8.823529412 | 0.033471497 |
| GOTERM_CC | autophagosome membrane          | 2  | 5.882352941 | 0.044328363 |
| GOTERM_MF | ATP binding                     | 9  | 26.47058824 | 0.006915887 |
| GOTERM_MF | protein serine/threonine kinase | 6  | 17.64705882 | 7.58E-04    |
|           | activity                        |    |             |             |

|              |                                   |   |             |             |
|--------------|-----------------------------------|---|-------------|-------------|
| GOTERM_MF    | protein homodimerization activity | 6 | 17.64705882 | 0.012958586 |
| GOTERM_MF    | enzyme binding                    | 5 | 14.70588235 | 0.003874601 |
| GOTERM_MF    | MAP kinase activity               | 4 | 11.76471    | 3.32E-04    |
| GOTERM_MF    | protein binding                   | 4 | 11.76471    | 0.004546126 |
| GOTERM_MF    | neutral amino acid                | 2 | 5.882352941 | 0.02130076  |
|              | transmembrane transporter         |   |             |             |
|              | activity                          |   |             |             |
| GOTERM_MF    | glucose binding                   | 2 | 5.882352941 | 0.02130076  |
| GOTERM_MF    | L-amino acid transmembrane        | 2 | 5.882352941 | 0.025126064 |
|              | transporter activity              |   |             |             |
| KEGG_PATHWAY | Biosynthesis of antibiotics       | 4 | 11.76470588 | 0.049025507 |
| KEGG_PATHWAY | Influenza A                       | 4 | 11.76470588 | 0.029808597 |
| KEGG_PATHWAY | MAPK signaling pathway            | 5 | 14.70588235 | 0.016101869 |
| KEGG_PATHWAY | TNF signaling pathway             | 4 | 11.76470588 | 0.008158715 |
| KEGG_PATHWAY | Toll-like receptor signaling      | 4 | 11.76470588 | 0.007950633 |
|              | pathway                           |   |             |             |
| KEGG_PATHWAY | Tuberculosis                      | 5 | 14.70588235 | 0.004679737 |
| KEGG_PATHWAY | Central carbon metabolism in      | 4 | 11.76470588 | 0.001915754 |
|              | cancer                            |   |             |             |
| KEGG_PATHWAY | Shigellosis                       | 4 | 11.76470588 | 0.001915754 |

|              |                                              |   |             |             |
|--------------|----------------------------------------------|---|-------------|-------------|
| KEGG_PATHWAY | FoxO signaling pathway                       | 5 | 14.70588235 | 0.001706101 |
| KEGG_PATHWAY | Toxoplasmosis                                | 5 | 14.70588235 | 8.18E-04    |
| KEGG_PATHWAY | Proteoglycans in cancer                      | 4 | 11.76470588 | 0.042420813 |
| KEGG_PATHWAY | Osteoclast differentiation                   | 4 | 11.76470588 | 0.014139835 |
| KEGG_PATHWAY | Neurotrophin signaling pathway               | 4 | 11.76470588 | 0.011160041 |
| KEGG_PATHWAY | Sphingolipid signaling pathway               | 4 | 11.76470588 | 0.011160041 |
| KEGG_PATHWAY | Chagas disease (American<br>trypanosomiasis) | 4 | 11.76470588 | 0.007544059 |
| KEGG_PATHWAY | Salmonella infection                         | 4 | 11.76470588 | 0.00402044  |
| KEGG_PATHWAY | Pertussis                                    | 4 | 11.76470588 | 0.003016994 |

---
