# Supplementary material for: Screening of potential key ferroptosis-related genes in sepsis
Source: PeerJ journal article supplement (doi:10.7717/peerj.13983), 2022-09-13
Supplement: Supplementary_Table_6.pdf [file Supplementary_Table_6.pdf]

---

| Node1     | Node2   | Combined_score |
|-----------|---------|----------------|
| MAPK14    | DUSP1   | 0.998          |
| PGD       | G6PD    | 0.998          |
| MAPK1     | DUSP1   | 0.996          |
| TLR4      | CD44    | 0.989          |
| MAPK1     | MAPK14  | 0.977          |
| DUSP1     | MAPK8   | 0.974          |
| MAPK1     | PEBP1   | 0.967          |
| MAPK1     | MAPK8   | 0.931          |
| GABARAPL2 | WIP1    | 0.898          |
| MAP3K5    | MAPK8   | 0.867          |
| MAPK14    | MAP3K5  | 0.863          |
| MAPK14    | MAPK8   | 0.803          |
| FLT3      | IDH1    | 0.802          |
| MAPK14    | CYBB    | 0.8            |
| G6PD      | IDH1    | 0.779          |
| TLR4      | CYBB    | 0.778          |
| ATM       | MAPK8   | 0.776          |
| PGD       | IDH1    | 0.77           |
| SLC7A5    | SLC38A1 | 0.768          |

|           |         |       |
|-----------|---------|-------|
| ZEB1      | CD44    | 0.713 |
| TLR4      | MAPK8   | 0.703 |
| MAPK1     | CYBB    | 0.689 |
| MAPK14    | TLR4    | 0.664 |
| MAPK14    | ATM     | 0.621 |
| MAP3K5    | TLR4    | 0.618 |
| GABARAPL2 | LAMP2   | 0.617 |
| DPP4      | CD44    | 0.599 |
| JDP2      | MAFG    | 0.533 |
| SLC2A3    | SLC38A1 | 0.532 |
| DUSP1     | TLR4    | 0.525 |
| MAP3K5    | CYBB    | 0.524 |
| FLT3      | CD44    | 0.519 |
| ATM       | IDH1    | 0.519 |
| SLC2A3    | G6PD    | 0.494 |
| ALOX5     | CYBB    | 0.493 |
| TLR4      | ALOX5   | 0.491 |
| ATM       | ZEB1    | 0.486 |
| FLT3      | ATM     | 0.475 |
| JDP2      | MAPK8   | 0.469 |

|        |        |       |
|--------|--------|-------|
| SLC2A3 | SLC7A5 | 0.452 |
| ACSL4  | LPIN1  | 0.447 |
| DUSP1  | MAP3K5 | 0.437 |
| WIPI1  | LAMP2  | 0.43  |
| MAPK1  | ATM    | 0.429 |
| MAPK14 | JDP2   | 0.427 |
| FLT3   | TLR4   | 0.419 |
| CYBB   | MAPK8  | 0.404 |

---
