# Supplementary material for: Screening of potential key ferroptosis-related genes in sepsis
Source: PeerJ journal article supplement (doi:10.7717/peerj.13983), 2022-09-13
Supplement: Supplementary_Table_7.pdf [file Supplementary_Table_7.pdf]

---

| RANK     | MCC           | Score     |
|----------|---------------|-----------|
| <b>1</b> | <b>MAPK14</b> | <b>68</b> |
| <b>2</b> | <b>MAPK8</b>  | <b>68</b> |
| <b>3</b> | <b>TLR4</b>   | <b>52</b> |
| <b>4</b> | <b>MAP3K5</b> | <b>48</b> |
| <b>5</b> | <b>CYBB</b>   | <b>32</b> |
| <b>6</b> | <b>DUSP1</b>  | <b>30</b> |
| <b>7</b> | <b>MAPK1</b>  | <b>19</b> |
| <b>8</b> | <b>ATM</b>    | <b>9</b>  |
| 9        | FLT3          | 4         |
| 10       | CD44          | 4         |
| 11       | IDH1          | 4         |
| 12       | JDP2          | 3         |
| 13       | G6PD          | 3         |
| 14       | SLC2A3        | 3         |
| 15       | ALOX5         | 2         |
| 16       | ZEB1          | 2         |
| 17       | PGD           | 2         |
| 18       | SLC38A1       | 2         |
| 19       | SLC7A5        | 2         |

|    |           |   |
|----|-----------|---|
| 20 | GABARAPL2 | 2 |
| 21 | WIPI1     | 2 |
| 22 | LAMP2     | 2 |
| 23 | PEBP1     | 1 |
| 24 | DPP4      | 1 |
| 25 | MAFG      | 1 |
| 26 | LPIN1     | 1 |
| 27 | ACSL4     | 1 |

---
