# Supplementary material for: Screening of potential key ferroptosis-related genes in sepsis
Source: PeerJ journal article supplement (doi:10.7717/peerj.13983), 2022-09-13
Supplement: Supplementary_Table_8.pdf [file Supplementary_Table_8.pdf]

| Category     | Term                 | Count | %    | Adj. p value | Gene ID                      |
|--------------|----------------------|-------|------|--------------|------------------------------|
| GOTERM_BP    | stress-activated     | 6     | 75   | 3.08E-07     | MAPK14/DUSP1/MAP3K5/MAPK1    |
|              | MAPK cascade         |       |      |              | /MAPK8/TLR4                  |
| GOTERM_BP    | stress-activated     | 6     | 75   | 3.08E-07     | MAPK14/DUSP1/MAP3K5/MAPK1    |
|              | protein kinase       |       |      |              | /MAPK8/TLR4                  |
|              | signaling cascade    |       |      |              |                              |
| GOTERM_BP    | response to          | 6     | 75   | 1.77E-06     | CYBB/DUSP1/MAP3K5/MAPK1      |
|              | oxidative stress     |       |      |              | /MAPK8/TLR4                  |
| GOTERM_MF    | protein              | 5     | 62.5 | 1.16E-05     | ATM/MAPK14/MAP3K5/MAPK1      |
|              | serine/threonine     |       |      |              | /MAPK8                       |
|              | kinase activity      |       |      |              |                              |
| GOTERM_BP    | regulation of MAP    | 5     | 62.5 | 1.76E-05     | MAPK14/DUSP1/MAP3K5/MAPK1    |
|              | kinase activity      |       |      |              | /TLR4                        |
| GOTERM_BP    | cellular response to | 5     | 62.5 | 1.76E-05     | CYBB/MAP3K5/MAPK1/MAPK8/TLR4 |
|              | external stimulus    |       |      |              |                              |
| GOTERM_BP    | activation of MAPK   | 4     | 50   | 4.24E-05     | MAPK14/MAP3K5/MAPK1/TLR4     |
|              | activity             |       |      |              |                              |
| GOTERM_BP    | cellular response to | 4     | 50   | 8.93E-05     | MAPK14/MAPK1/MAPK8/TLR4      |
|              | lipopolysaccharide   |       |      |              |                              |
| KEGG_PATHWAY | NOD-like receptor    | 5     | 62.5 | 2.26E-05     | MAPK14/CYBB/MAPK1/MAPK8/TLR4 |

|              |                     |   |      |          |                             |
|--------------|---------------------|---|------|----------|-----------------------------|
|              | signaling pathway   |   |      |          |                             |
| KEGG_PATHWAY | Shigellosis         | 5 | 62.5 | 3.17E-05 | ATM/MAPK14/MAPK1/MAPK8/TLR4 |
| KEGG_PATHWAY | Toll-like receptor  |   | 50   |          |                             |
|              | signaling pathway   | 4 |      | 3.17E-05 | MAPK14/MAPK1/MAPK8/TLR4     |
| KEGG_PATHWAY | TNF signaling       |   | 50   |          |                             |
|              | pathway             | 4 |      | 3.41E-05 | MAPK14/MAP3K5/MAPK1/MAPK8   |
| KEGG_PATHWAY | MAPK signaling      |   | 62.5 |          | MAPK14/DUSP1/MAP3K5/MAPK1   |
|              | pathway             | 5 |      | 3.53E-05 | /MAPK8                      |
| KEGG_PATHWAY | FoxO signaling      |   | 50   |          |                             |
|              | pathway             | 4 |      | 4.56E-05 | ATM/MAPK14/MAPK1/MAPK8      |
| KEGG_PATHWAY | Apoptosis           | 4 | 50   | 4.76E-05 | ATM/MAP3K5/MAPK1/MAPK8      |
| KEGG_PATHWAY | Fluid shear stress  |   | 50   |          |                             |
|              | and atherosclerosis | 4 |      | 4.76E-05 | MAPK14/DUSP1/MAP3K5/MAPK8   |

---
