# Supplementary material for: Screening of potential key ferroptosis-related genes in sepsis
Source: PeerJ journal article supplement (doi:10.7717/peerj.13983), 2022-09-13
Supplement: Supplementary_Table_9.pdf [file Supplementary_Table_9.pdf]

---

| miRNAs          | gene symbol | p. value |
|-----------------|-------------|----------|
| hsa-miR-940     | ATM         | 6.16E-05 |
| hsa-miR-92a-3p  | ATM         | 2.83E-05 |
| hsa-miR-8070    | ATM         | 0.001092 |
| hsa-miR-7160-5p | ATM         | 0.001327 |
| hsa-miR-7151-3p | ATM         | 0.001556 |
| hsa-miR-6893-5p | ATM         | 0.002737 |
| hsa-miR-6884-5p | ATM         | 0.003374 |
| hsa-miR-6808-5p | ATM         | 0.013218 |
| hsa-miR-6771-5p | ATM         | 7.91E-05 |
| hsa-miR-665     | ATM         | 0.00081  |
| hsa-miR-572     | ATM         | 1.49E-06 |
| hsa-miR-485-5p  | ATM         | 2.34E-05 |
| hsa-miR-4768-3p | ATM         | 0.00081  |
| hsa-miR-4722-5p | ATM         | 1.72E-05 |
| hsa-miR-4695-5p | ATM         | 0.000732 |
| hsa-miR-4537    | ATM         | 1.27E-06 |
| hsa-miR-4478    | ATM         | 0.001371 |
| hsa-miR-3144-3p | ATM         | 2.41E-05 |
| hsa-miR-2467-3p | ATM         | 0.002972 |

|                 |       |          |
|-----------------|-------|----------|
| hsa-miR-223-3p  | ATM   | 0.00403  |
| hsa-miR-1910-3p | ATM   | 0.001371 |
| hsa-miR-18a-3p  | ATM   | 2.85E-05 |
| hsa-miR-1827    | ATM   | 0.0074   |
| hsa-miR-7113-3p | CYBB  | 0.03071  |
| hsa-miR-6892-3p | CYBB  | 7.25E-05 |
| hsa-miR-6859-3p | CYBB  | 0.003539 |
| hsa-miR-6734-3p | CYBB  | 0.003026 |
| hsa-miR-4685-3p | CYBB  | 0.004018 |
| hsa-miR-4640-3p | CYBB  | 0.014036 |
| hsa-miR-34a-5p  | CYBB  | 3.65E-05 |
| hsa-miR-3183    | CYBB  | 0.000124 |
| hsa-miR-1282    | CYBB  | 0.004039 |
| hsa-miR-769-5p  | MAPK1 | 2.75E-05 |
| hsa-miR-766-3p  | MAPK1 | 0.000428 |
| hsa-miR-7111-3p | MAPK1 | 0.000184 |
| hsa-miR-7110-3p | MAPK1 | 9.23E-05 |
| hsa-miR-6873-3p | MAPK1 | 0.000209 |
| hsa-miR-6867-3p | MAPK1 | 0.001951 |
| hsa-miR-6862-5p | MAPK1 | 2.82E-05 |

|                 |       |          |
|-----------------|-------|----------|
| hsa-miR-6857-5p | MAPK1 | 0.005105 |
| hsa-miR-6853-5p | MAPK1 | 0.001112 |
| hsa-miR-6846-3p | MAPK1 | 0.000352 |
| hsa-miR-6831-5p | MAPK1 | 0.001132 |
| hsa-miR-6817-3p | MAPK1 | 2.40E-05 |
| hsa-miR-6813-5p | MAPK1 | 0.000153 |
| hsa-miR-6810-5p | MAPK1 | 9.99E-05 |
| hsa-miR-6808-3p | MAPK1 | 0.000138 |
| hsa-miR-6777-3p | MAPK1 | 3.28E-07 |
| hsa-miR-6763-5p | MAPK1 | 0.002692 |
| hsa-miR-6741-3p | MAPK1 | 7.62E-07 |
| hsa-miR-6734-3p | MAPK1 | 8.46E-08 |
| hsa-miR-6720-5p | MAPK1 | 4.01E-08 |
| hsa-miR-6512-3p | MAPK1 | 7.32E-05 |
| hsa-miR-6499-3p | MAPK1 | 0.000214 |
| hsa-miR-6085    | MAPK1 | 0.002107 |
| hsa-miR-585-3p  | MAPK1 | 0.000214 |
| hsa-miR-584-5p  | MAPK1 | 2.15E-06 |
| hsa-miR-5698    | MAPK1 | 0.013437 |
| hsa-miR-5581-5p | MAPK1 | 0.000239 |

|                 |       |          |
|-----------------|-------|----------|
| hsa-miR-526b-3p | MAPK1 | 0.000114 |
| hsa-miR-519d-3p | MAPK1 | 1.82E-06 |
| hsa-miR-519b-3p | MAPK1 | 1.82E-06 |
| hsa-miR-5190    | MAPK1 | 0.000654 |
| hsa-miR-504-3p  | MAPK1 | 0.000153 |
| hsa-miR-5000-5p | MAPK1 | 0.000926 |
| hsa-miR-499a-3p | MAPK1 | 0.004295 |
| hsa-miR-494-3p  | MAPK1 | 0.00323  |
| hsa-miR-487a-3p | MAPK1 | 0.001102 |
| hsa-miR-4796-3p | MAPK1 | 0.009011 |
| hsa-miR-4784    | MAPK1 | 0.000617 |
| hsa-miR-4770    | MAPK1 | 0.000581 |
| hsa-miR-4741    | MAPK1 | 0.006498 |
| hsa-miR-4725-3p | MAPK1 | 0.001825 |
| hsa-miR-4708-5p | MAPK1 | 1.31E-05 |
| hsa-miR-4692    | MAPK1 | 0.000404 |
| hsa-miR-4691-3p | MAPK1 | 5.17E-08 |
| hsa-miR-4689    | MAPK1 | 0.000566 |
| hsa-miR-4675    | MAPK1 | 0.000215 |
| hsa-miR-4667-3p | MAPK1 | 0.000184 |

|                  |       |          |
|------------------|-------|----------|
| hsa-miR-4638-5p  | MAPK1 | 8.89E-07 |
| hsa-miR-4514     | MAPK1 | 0.000569 |
| hsa-miR-449b-3p  | MAPK1 | 0.0014   |
| hsa-miR-4433a-3p | MAPK1 | 7.39E-05 |
| hsa-miR-4430     | MAPK1 | 0.000166 |
| hsa-miR-4420     | MAPK1 | 0.005115 |
| hsa-miR-4287     | MAPK1 | 6.95E-06 |
| hsa-miR-4271     | MAPK1 | 0.005008 |
| hsa-miR-4253     | MAPK1 | 2.72E-05 |
| hsa-miR-4252     | MAPK1 | 0.000145 |
| hsa-miR-3936     | MAPK1 | 0.000638 |
| hsa-miR-3927-5p  | MAPK1 | 0.000161 |
| hsa-miR-378a-3p  | MAPK1 | 0.024706 |
| hsa-miR-371b-3p  | MAPK1 | 1.82E-06 |
| hsa-miR-3666     | MAPK1 | 0.005779 |
| hsa-miR-3652     | MAPK1 | 6.25E-06 |
| hsa-miR-3609     | MAPK1 | 0.001144 |
| hsa-miR-3605-5p  | MAPK1 | 0.006699 |
| hsa-miR-329-3p   | MAPK1 | 0.000249 |
| hsa-miR-3150a-3p | MAPK1 | 1.03E-05 |

|                  |       |          |
|------------------|-------|----------|
| hsa-miR-3135b    | MAPK1 | 7.24E-05 |
| hsa-miR-28-5p    | MAPK1 | 0.000629 |
| hsa-miR-214-3p   | MAPK1 | 2.85E-06 |
| hsa-miR-2110     | MAPK1 | 0.013437 |
| hsa-miR-20b-5p   | MAPK1 | 0.006513 |
| hsa-miR-20a-5p   | MAPK1 | 0.006513 |
| hsa-miR-199a-3p  | MAPK1 | 0.000131 |
| hsa-miR-197-3p   | MAPK1 | 7.62E-07 |
| hsa-miR-196a-5p  | MAPK1 | 0.002299 |
| hsa-miR-18b-3p   | MAPK1 | 0.003629 |
| hsa-miR-181a-5p  | MAPK1 | 0.000306 |
| hsa-miR-17-5p    | MAPK1 | 0.000676 |
| hsa-miR-130b-3p  | MAPK1 | 0.006987 |
| hsa-miR-130a-3p  | MAPK1 | 0.002241 |
| hsa-miR-1255b-5p | MAPK1 | 0.0118   |
| hsa-miR-1255a    | MAPK1 | 0.0118   |
| hsa-miR-122-5p   | MAPK1 | 0.014047 |
| hsa-miR-1200     | MAPK1 | 3.46E-05 |
| hsa-miR-106b-5p  | MAPK1 | 0.000564 |
| hsa-miR-106a-5p  | MAPK1 | 0.000676 |

|                  |        |          |
|------------------|--------|----------|
| hsa-let-7b-5p    | MAPK1  | 0.010863 |
| hsa-miR-8055     | MAPK14 | 0.000181 |
| hsa-miR-7113-3p  | MAPK14 | 0.011616 |
| hsa-miR-6892-3p  | MAPK14 | 0.002466 |
| hsa-miR-6864-3p  | MAPK14 | 0.000186 |
| hsa-miR-6836-3p  | MAPK14 | 0.000264 |
| hsa-miR-6820-3p  | MAPK14 | 0.000115 |
| hsa-miR-6781-3p  | MAPK14 | 3.79E-06 |
| hsa-miR-6773-3p  | MAPK14 | 0.000186 |
| hsa-miR-6760-3p  | MAPK14 | 0.008142 |
| hsa-miR-6759-3p  | MAPK14 | 2.82E-05 |
| hsa-miR-6501-5p  | MAPK14 | 8.69E-06 |
| hsa-miR-643      | MAPK14 | 0.000697 |
| hsa-miR-513b-5p  | MAPK14 | 5.85E-06 |
| hsa-miR-4735-5p  | MAPK14 | 0.004393 |
| hsa-miR-4685-3p  | MAPK14 | 0.011616 |
| hsa-miR-4680-5p  | MAPK14 | 0.000194 |
| hsa-miR-4524a-3p | MAPK14 | 0.003198 |
| hsa-miR-4469     | MAPK14 | 0.019726 |
| hsa-miR-4423-5p  | MAPK14 | 0.010056 |

|                 |        |          |
|-----------------|--------|----------|
| hsa-miR-4287    | MAPK14 | 0.000256 |
| hsa-miR-3672    | MAPK14 | 0.001696 |
| hsa-miR-2682-3p | MAPK14 | 0.001334 |
| hsa-miR-24-3p   | MAPK14 | 0.005943 |
| hsa-miR-2276-5p | MAPK14 | 0.025896 |
| hsa-miR-215-3p  | MAPK14 | 3.63E-06 |
| hsa-miR-214-3p  | MAPK14 | 6.46E-06 |
| hsa-miR-205-5p  | MAPK14 | 0.011616 |
| hsa-miR-199a-3p | MAPK14 | 0.00012  |
| hsa-miR-186-3p  | MAPK14 | 6.42E-05 |
| hsa-miR-17-5p   | MAPK14 | 7.45E-07 |
| hsa-miR-155-5p  | MAPK14 | 0.002215 |
| hsa-miR-1267    | MAPK14 | 0.001877 |
| hsa-miR-125a-3p | MAPK14 | 0.001381 |
| hsa-miR-1250-3p | MAPK14 | 0.00012  |
| hsa-miR-124-3p  | MAPK14 | 7.26E-06 |
| hsa-miR-1234-3p | MAPK14 | 0.000939 |
| hsa-miR-1208    | MAPK14 | 0.002998 |
| hsa-miR-1183    | MAPK14 | 0.043633 |
| hsa-miR-106a-5p | MAPK14 | 7.45E-07 |



|                  |       |          |
|------------------|-------|----------|
| hsa-miR-892b     | MAPK8 | 0.000428 |
| hsa-miR-8060     | MAPK8 | 0.000924 |
| hsa-miR-664a-3p  | MAPK8 | 0.00802  |
| hsa-miR-557      | MAPK8 | 0.002092 |
| hsa-miR-497-3p   | MAPK8 | 0.001244 |
| hsa-miR-496      | MAPK8 | 0.000692 |
| hsa-miR-4524b-5p | MAPK8 | 0.011921 |
| hsa-miR-433-3p   | MAPK8 | 0.006843 |
| hsa-miR-3680-3p  | MAPK8 | 5.25E-05 |
| hsa-miR-214-3p   | MAPK8 | 1.41E-07 |
| hsa-miR-193b-3p  | MAPK8 | 0.007551 |
| hsa-miR-10a-5p   | MAPK8 | 1.13E-06 |
| hsa-miR-942-5p   | TLR4  | 0.000188 |
| hsa-miR-526b-5p  | TLR4  | 0.000279 |
| hsa-miR-4742-3p  | TLR4  | 0.000444 |
| hsa-miR-4738-3p  | TLR4  | 0.000309 |
| hsa-miR-4698     | TLR4  | 0.003893 |
| hsa-miR-4694-3p  | TLR4  | 0.042042 |
| hsa-miR-4659a-3p | TLR4  | 0.037545 |
| hsa-let-7b-5p    | TLR4  | 0.004797 |

---
