# Supplementary material for: Screening of potential key ferroptosis-related genes in sepsis
Source: PeerJ journal article supplement (doi:10.7717/peerj.13983), 2022-09-13
Supplement: Supplementary_Table_10.pdf [file Supplementary_Table_10.pdf]

| miRNA           | Target LncRNA       | Pr. score    |
|-----------------|---------------------|--------------|
| hsa-miR-199a-3p | MALAT1              | 0.724        |
|                 | SNHG1               | 0.714        |
|                 | HOXA10-HOXA9        | 0.706        |
|                 | LINC00657           | 0.704        |
|                 | NEAT1               | 0.614        |
|                 | CASC7               | 0.571        |
|                 | CTC-444N24.11       | 0.557        |
|                 | BLOC1S5-TXNDC5      | 0.425        |
|                 | ZFAS1               | 0.397        |
| hsa-miR-17-5p   | <b>CTB-89H12.4</b>  | <b>0.922</b> |
|                 | <b>LINC00657</b>    | <b>0.905</b> |
|                 | NEAT1               | 0.799        |
|                 | MALAT1              | 0.732        |
|                 | H19                 | 0.56         |
|                 | RNU12               | 0.527        |
|                 | CROCCP2             | 0.416        |
| hsa-miR-106a-5p | <b>CTB-89H12.4</b>  | <b>0.996</b> |
|                 | <b>RP11-553L6.5</b> | <b>0.995</b> |
|                 | <b>NEAT1</b>        | <b>0.935</b> |

|               |                     |              |
|---------------|---------------------|--------------|
|               | <b>XLOC_013866</b>  | <b>0.929</b> |
|               | <b>RP1-309I22.2</b> | <b>0.911</b> |
|               | MALAT1              | 0.797        |
|               | LINC00657           | 0.781        |
|               | RP11-217B1.2        | 0.607        |
|               | SCARNA10            | 0.496        |
|               | AC008746.12         | 0.382        |
| hsa-let-7b-5p | <b>TRG-AS1</b>      | <b>0.98</b>  |
|               | <b>TUG1</b>         | <b>0.951</b> |
|               | <b>NEAT1</b>        | <b>0.907</b> |
|               | <b>HOXA10-HOXA9</b> | <b>0.905</b> |
|               | TTY15               | 0.787        |
|               | XLOC_008295         | 0.787        |
|               | NUTM2A-AS1          | 0.672        |
|               | OIP5-AS1            | 0.534        |
|               | XLOC_013866         | 0.438        |
|               | VTRNA2-1            | 0.405        |
|               | H19                 | 0.402        |
|               | RP11-227G15.3       | 0.4          |
|               | RP11-140H17.2       | 0.396        |

|                |                 |              |
|----------------|-----------------|--------------|
|                | LINC00910       | 0.393        |
|                | RPPH1           | 0.386        |
|                | XLOC_000992     | 0.386        |
|                | RNASEK-C17orf49 | 0.384        |
|                | MALAT1          | 0.371        |
|                | AC084082.3      | 0.367        |
| hsa-miR-214-3p | <b>NEAT1</b>    | <b>0.935</b> |
|                | <b>C1RL-AS1</b> | <b>0.925</b> |
|                | ABHD14A-ACY1    | 0.879        |
|                | CTD-3148I10.15  | 0.854        |
|                | AC005540.3      | 0.818        |
|                | CASC7           | 0.811        |
|                | IPO11-LRRC70    | 0.793        |
|                | PSMG3-AS1       | 0.735        |
|                | P2RX5-TAX1BP3   | 0.733        |
|                | SNHG16          | 0.726        |
|                | HEIH            | 0.692        |
|                | LINC00657       | 0.633        |
|                | AC005154.6      | 0.583        |
|                | SNHG12          | 0.574        |

|                |       |
|----------------|-------|
| MALAT1         | 0.551 |
| RP1-178F10.3   | 0.528 |
| OIP5-AS1       | 0.515 |
| TMX2-CTNND1    | 0.5   |
| BLOC1S5-TXNDC5 | 0.479 |
| RP11-890B15.3  | 0.475 |
| AC003092.1     | 0.465 |
| MEG3           | 0.462 |

---
